## Simple clinical parameters could help to identify the patients with a high probability of new-onset atrial fibrillation in acute myocardial infarction

Raczowska-Golanko M.<sup>1</sup>; Puchalski W.<sup>2</sup>; Gruchala M.<sup>2</sup>; Raczak G.<sup>1</sup>; Danilowicz-Szymanowicz L.<sup>1</sup>

<sup>1</sup>Medical University of Gdansk, Department of Cardiology and Electrotherapy, Gdansk, Poland

<sup>2</sup>Medical University of Gdansk, I Department of Cardiology, Gdansk, Poland

**Funding Acknowledgements:** Type of funding sources: None.

**Background:** New-onset atrial fibrillation (NOAF) is a significant complication of acute myocardial infarction (AMI) associated with a poor prognosis. The knowledge and understanding of risk factors of this arrhythmia are still the subjects of interest. Purpose: We aimed to investigate which clinical, routinely checked parameters could have the most predictive power on NOAF occurrence in AMI patients.

**Patients and methods:** This single-center, retrospective study was conducted on 954 consecutive patients admitted to our university clinical center with AMI diagnosis from January 2017 to December 2018. Patients underwent routine clinical assessment and laboratory investigations. AF detected at the time of admission or during a hospital stay, without a prior history of persistent or paroxysmal AF, was diagnosed as NOAF. Detailed medical history, routinely checked laboratory and echocardiography parameters, invasive and pharmacological treatment, as well as complications and in-hospital mortality, were taken into consideration.

**Results:** NOAF was documented in 106 (11%) AMI patients at median age 74 (66 - 84) years old, and was significantly associated with in-hospital mortality [OR 4.53,  $p < 0.001$ ]. There were some clinical factors significantly predicted NOAF in univariate logistic regression analysis: age  $\geq 66$  years old (odds ratio [OR] 3.09,  $p < 0.001$ ), B-type natriuretic peptide (BNP)  $\geq 340$  pg/ml (OR 5.28,  $p < 0.001$ ), C-reactive protein (CRP)  $\geq 7.7$  mg/l (OR 3.53,  $p < 0.001$ ), high-sensitivity troponin  $\geq 1.85$  ng/ml (OR 2.4,  $p < 0.001$ ), total cholesterol  $\leq 195$  mg/dl (OR 2.17,  $p < 0.002$ ), low-density lipoprotein  $\leq 128.5$  mg/dl (OR 2.03,  $p < 0.007$ ), potassium level  $\leq 4.2$  mmol/l (OR 1.92,  $p < 0.002$ ), hemoglobin  $\leq 14$  g/dl (OR 1.71,  $p < 0.020$ ), leucocytes  $\geq 10.2 \times 10^9/l$  (OR 1.76,  $p < 0.009$ ), neutrophil to lymphocyte ratio  $\geq 4.6$  (OR 1.85,  $p < 0.004$ ), left atrium size  $\geq 41$  mm (OR 2.14,  $p < 0.001$ ), and left ventricular ejection fraction (LVEF)  $\leq 44\%$  (OR 2.99,  $p < 0.001$ ). Age, BNP, CRP, and LVEF at mentioned above pre-specified cut-off values turned out to be the most important independent predictors of NOAF development in multivariate analysis.

**Conclusions:** NOAF is a multifactorial, significant complication of AMI, leading to a worse prognosis. Older age, higher BNP and CRP level, and lower LVEF are independently associated with the probability of NOAF.
